# Supplementary material for: Elucidating the capacitive desalination behavior of NaxCoO2: the significance of electrochemical pre-activation
Source: Royal Society of Chemistry journal article supplement (doi:10.1039/d0nr00248h), 2020-01-01

**Elucidating the Capacitive Desalination Behavior of  $\text{Na}_x\text{CoO}_2$ : the Significance  
of Electrochemical Pre-activation**

Zhenzhen Liu, Wei Ma, Haibo Li\*

Ningxia Key Laboratory of Photovoltaic Materials, Ningxia University, Yinchuan,  
Ningxia, 750021, P. R. China

\*Corresponding author. Fax/Tel.: +86 0951 2062414; E-mail: lihaibo@nxu.edu.cn

(Haibo Li)

## Experimental

The crystallite size was calculated as the following equation:

$$D = \frac{K\lambda}{\beta \cos \theta} \quad (\text{S1})$$

Where  $D$  is the crystallite size,  $K$  is a constant (0.943),  $\lambda$  is the x-ray wavelength (0.154056 nm),  $\beta$  is the full width at half maximum of the diffraction peak, and  $\theta$  is the diffraction angle. In the calculation, the full width at half maximum ( $\beta$ ) needs to be converted into radians and substituted into the formula.

Table S1 The average crystallite size of  $\text{Na}_x\text{CoO}_2$ .

| Sample                       | D (nm)  |
|------------------------------|---------|
| $\text{Na}_{0.2}\text{CO}_2$ | 42.8705 |
| $\text{Na}_{0.5}\text{CO}_2$ | 45.0451 |
| $\text{Na}_{0.7}\text{CO}_2$ | 45.1625 |
| $\text{Na}_{1.0}\text{CO}_2$ | 45.0527 |
| $\text{Na}_{1.6}\text{CO}_2$ | 44.8798 |

Table S2 Pore texture of  $\text{Na}_x\text{CoO}_2$ .

| Sample                       | $S_{\text{BET}}$ ( $\text{m}^2/\text{g}$ ) | V ( $\text{cm}^3/\text{g}$ ) | $D_{\text{avg}}$ (nm) |
|------------------------------|--------------------------------------------|------------------------------|-----------------------|
| $\text{Na}_{0.2}\text{CO}_2$ | 3.832                                      | 0.048                        | 50.3                  |
| $\text{Na}_{0.5}\text{CO}_2$ | 2.827                                      | 0.031                        | 43.571                |
| $\text{Na}_{0.7}\text{CO}_2$ | 3.260                                      | 0.049                        | 59.934                |
| $\text{Na}_{1.0}\text{CO}_2$ | 1.552                                      | 0.013                        | 33.202                |
| $\text{Na}_{1.6}\text{CO}_2$ | 1.720                                      | 0.013                        | 30.261                |

Table S3  $R_s$  and  $R_{\text{ct}}$  fitted from the equivalent circuit.

| Sample                       | $R_s$ | $R_{\text{ct}}$ |
|------------------------------|-------|-----------------|
| $\text{Na}_{0.2}\text{CO}_2$ | 5.87  | 0.47            |
| $\text{Na}_{0.5}\text{CO}_2$ | 7.39  | 1.35            |
| $\text{Na}_{0.7}\text{CO}_2$ | 0.83  | 0.12            |
| $\text{Na}_{1.0}\text{CO}_2$ | 3.55  | 1.31            |
| $\text{Na}_{1.6}\text{CO}_2$ | 5.48  | 3.09            |

## Figure caption

Fig. S1 The elemental mapping image of (a)  $\text{Na}_{0.2}\text{CoO}_2$ , (b)  $\text{Na}_{0.5}\text{CoO}_2$ , (c)  $\text{Na}_{0.7}\text{CoO}_2$ , (d)  $\text{Na}_{1.0}\text{CoO}_2$  and (e)  $\text{Na}_{1.6}\text{CoO}_2$ .

Fig. S2 Current (a) and energy (b) profiles of  $\text{Na}_{0.7}\text{CoO}_2 \parallel \text{AC}$  system in NaCl solution with an initial conductivity of  $1000 \mu\text{S}/\text{cm}$ .

Fig. S3 (a) The conductivity transient of  $\text{Na}_{0.7}\text{CoO}_2$  in NaCl solution with an initial conductivity of  $1000 \mu\text{S}/\text{cm}$  at 0.3 and 0.6 V, (b) XRD patterns of  $\text{Na}_{0.7}\text{CoO}_2$  after applying different potential

Fig. S4 The current transient of  $\text{Na}_{0.7}\text{CoO}_2$  at 1.2 V and 0.6 V in NaCl solution with an initial conductivity of  $1000 \mu\text{S}/\text{cm}$ .

Fig. S5 XRD patterns of the initial  $\text{Na}_x\text{CoO}_2$  and  $\text{Na}_x\text{CoO}_2$  after sodium insertion (red line), the insert are corresponding SEM images of  $\text{Na}_x\text{CoO}_2$  electrodes after sodium insertion.

Fig. S6(a) salt removal capacity (mg/g) in terms of potential (V) for  $\text{Na}_x\text{CoO}_2$  with an initial conductivity of  $1000 \mu\text{S}/\text{cm}$ . (b) the effect of voltage on the CDI Ragone Kim-Yoon-Plot in NaCl solution.

Fig. S1

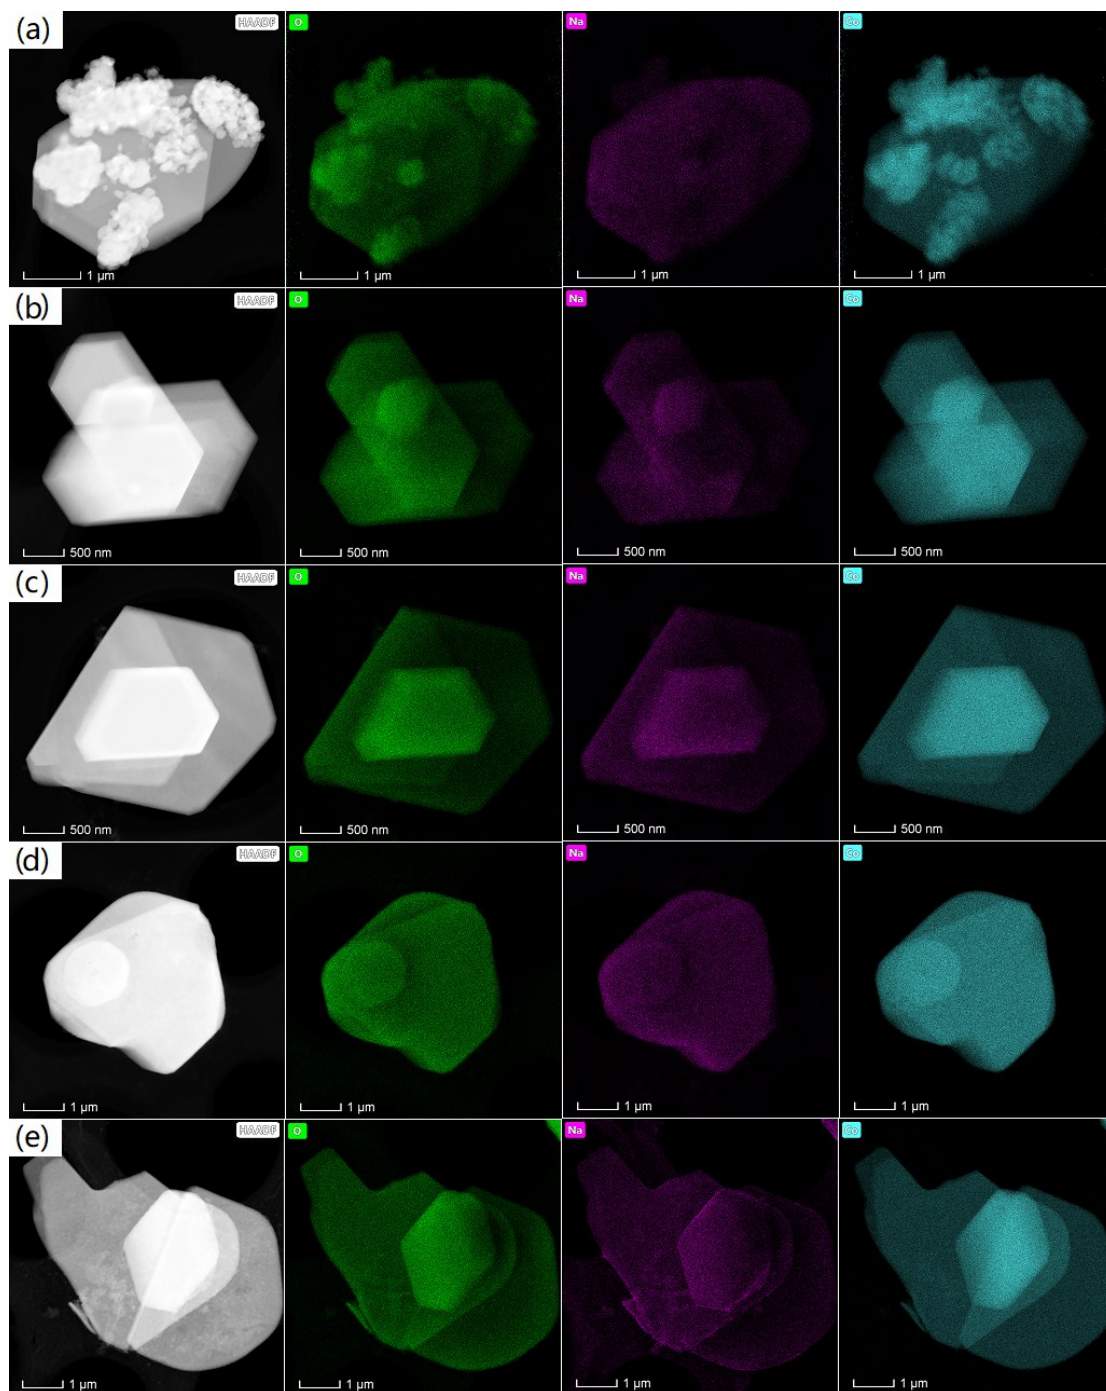

**Fig. S2**

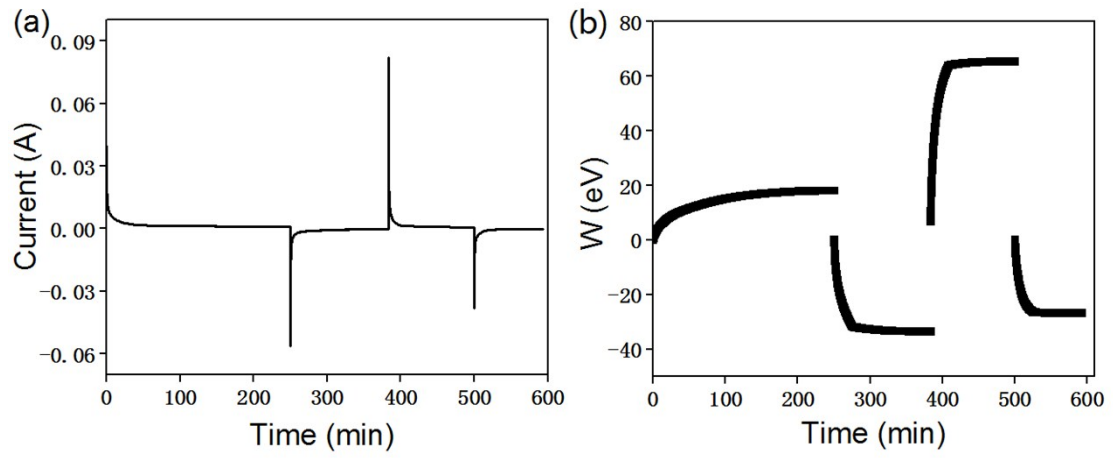

**Fig. S3**

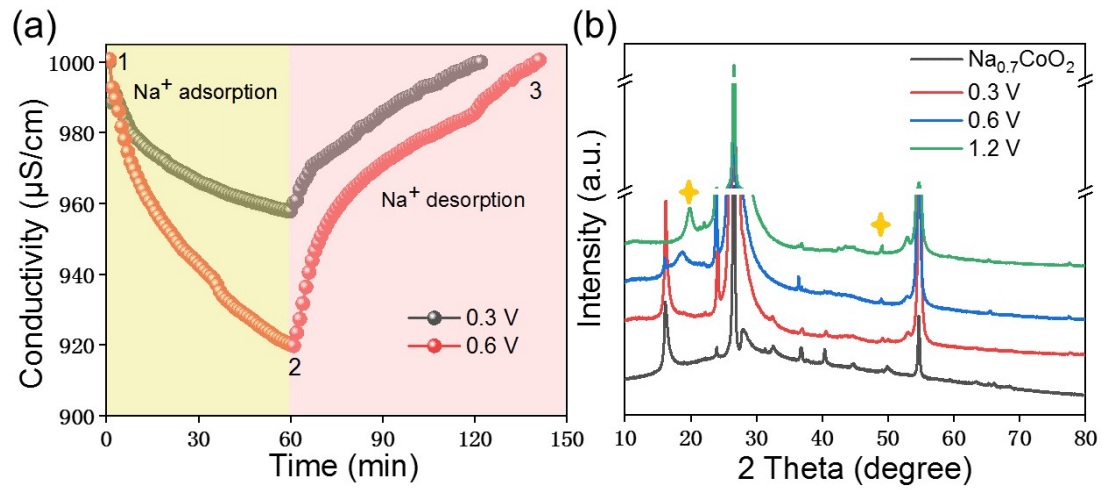

Fig. S4

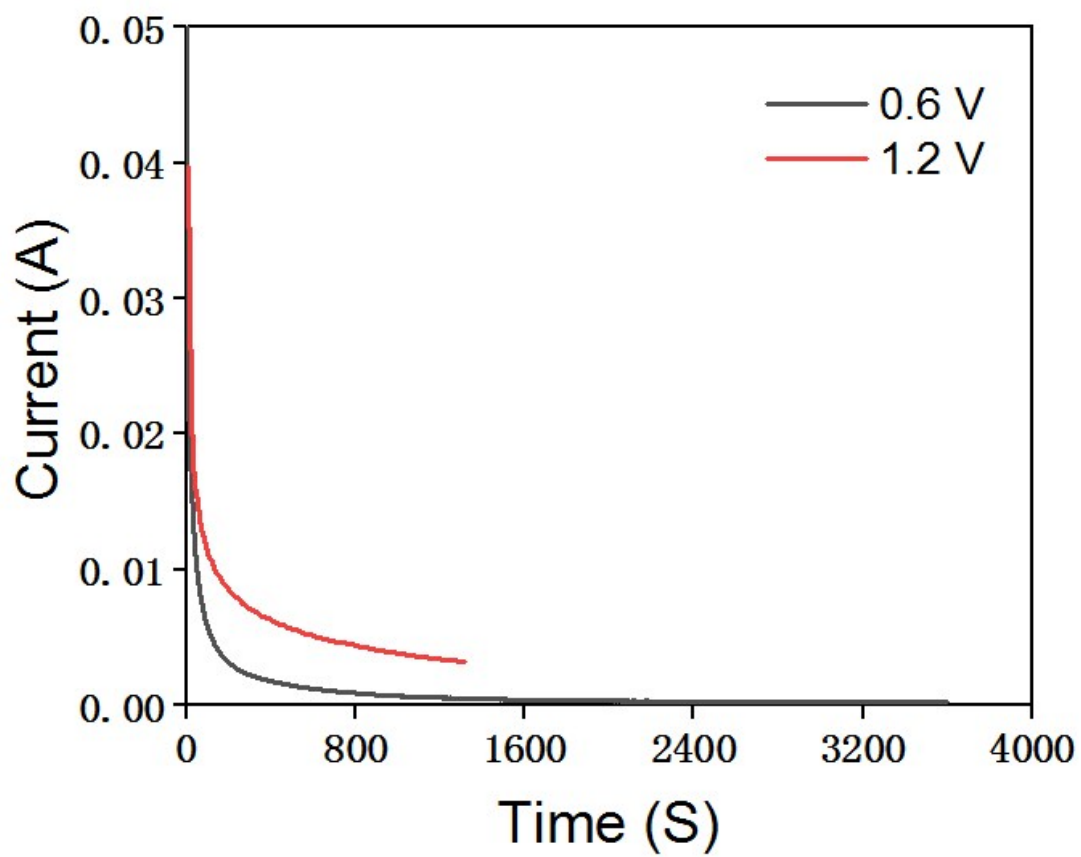

Fig. S5

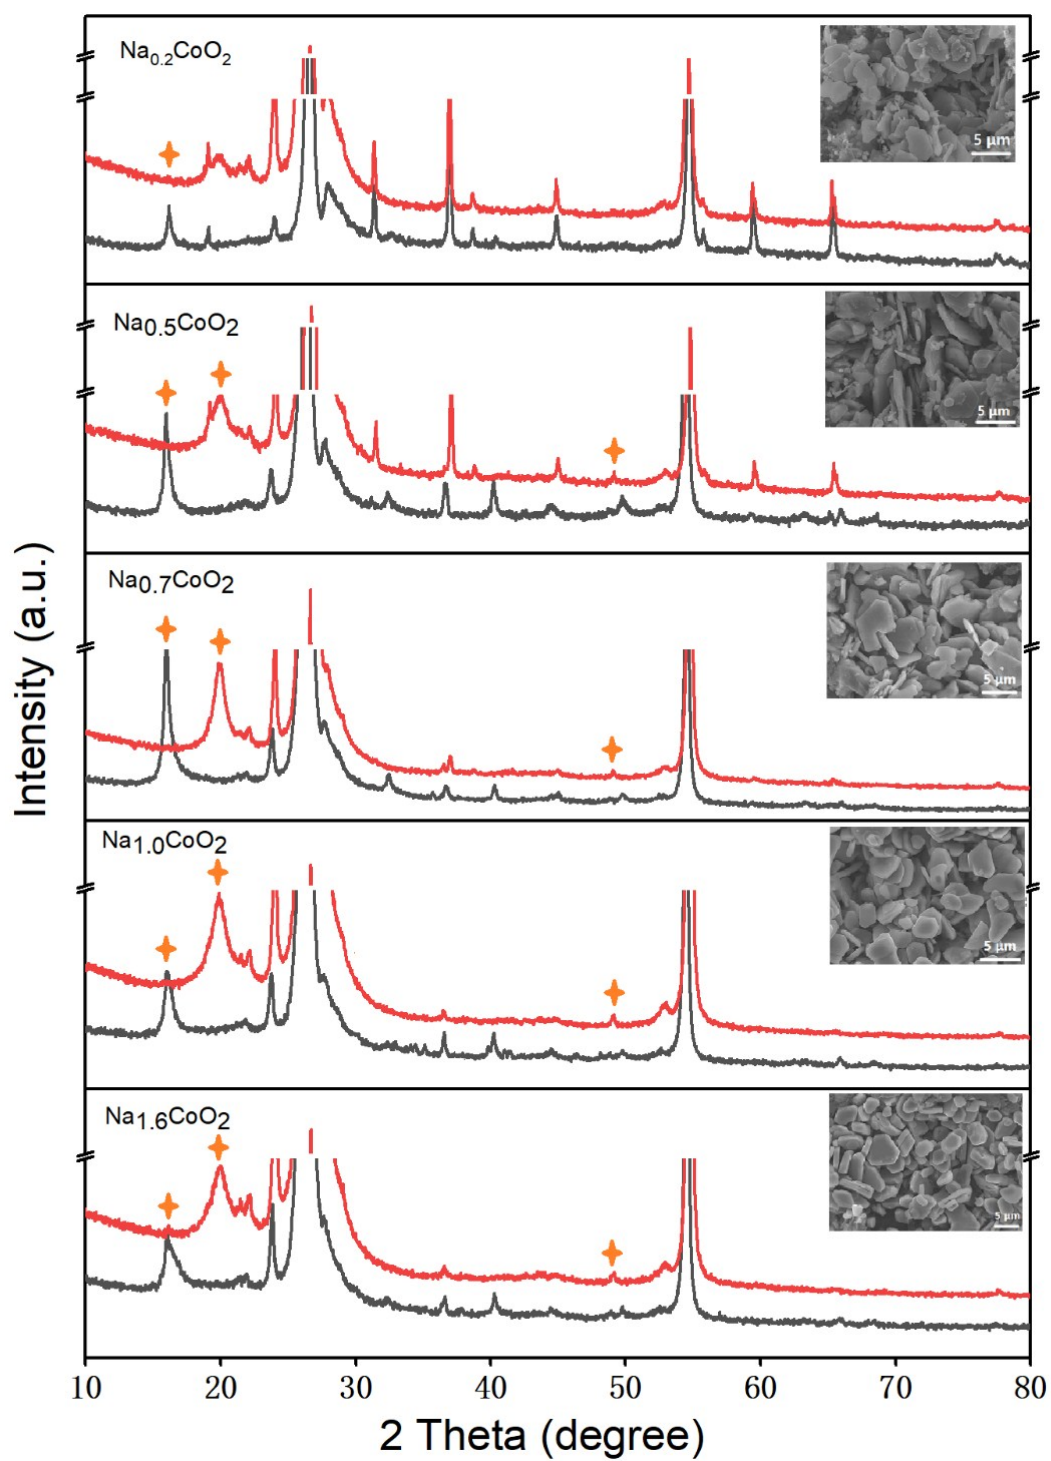



Fig. S6

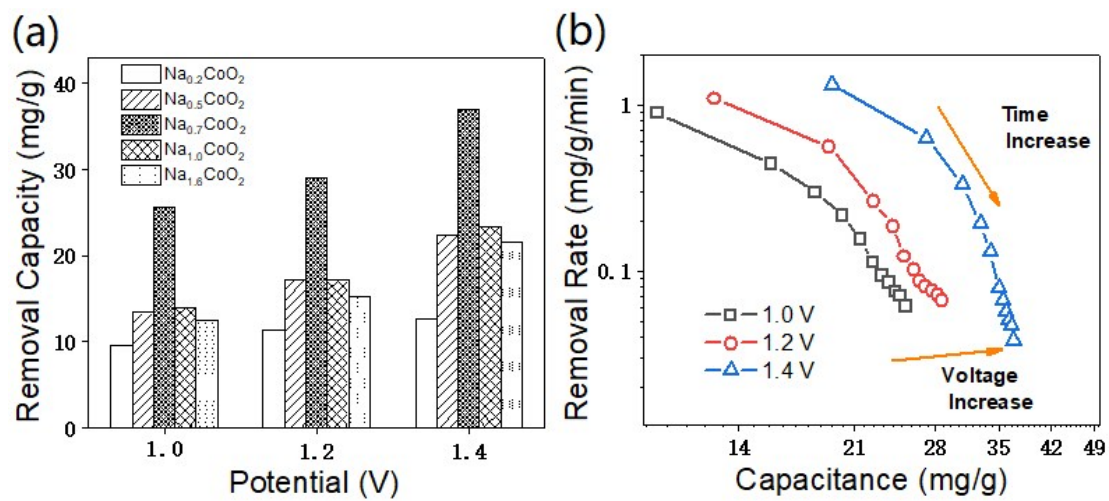

Supplement: d0nr00248h1.pdf [file d0nr00248h1.pdf]
